# Supplementary material for: AEG-1 Regulates TWIK-1 Expression as an RNA-Binding Protein in Astrocytes
Source: Brain Sci. 2021 Jan 11;11(1):85. doi: 10.3390/brainsci11010085 (PMC7827766; doi:10.3390/brainsci11010085)
Supplement: Supplementary file 1 [file brainsci-11-00085-s001.xlsx]

## Sheet: Sheet1
	Fold change	p-value	Average of normalized data (log2)		Normalized data (log2)				Raw data (FPKM)
Gene symbol	AEG1_shRNA_group /Control_group	AEG1_shRNA_group /Control_group	Control_group	AEG1_shRNA_group	Control1	Control2	AEG1_shRNA1	AEG1_sh RNA2	Control1	Control2	AEG1_shRNA1	AEG1_sh RNA2
Rps27	0.0704456	0.000890062	6.22598	2.39864	6.26528	6.18558	2.3411	2.45396	76.0308	72.3727	4.04178	4.42888
Chil1	0.101974	0.00344234	8.78587	5.49214	8.82296	8.7478	4.62781	6.02888	452.571	432.576	23.6261	63.8394
Lgi2	0.238001	0.0382633	4.62697	2.55602	4.82607	4.39594	2.78421	2.28482	27.4032	20.2157	5.86145	3.83353
Steap4	0.24167	0.0253194	9.00734	6.95845	9.14599	8.85393	7.32729	6.46168	566.403	465.699	159.021	86.5293
Lect1	0.266796	0.0468799	4.30196	2.39577	4.04256	4.52175	2.4128	2.37853	15.5017	22.1366	4.30386	4.16071
Serpina3n	0.277622	0.0330942	7.88514	6.03633	7.99731	7.7635	6.50979	5.32691	254.915	218.156	89.7993	38.8524
Fxyd1	0.304353	0.012815	7.39014	5.67396	7.48332	7.29051	5.86566	5.45282	178.212	156.887	57.0977	42.4919
Ptgds	0.308906	0.00472576	4.53109	2.83633	4.46914	4.59049	2.72718	2.9378	21.1791	23.2739	5.59535	6.60685
Cdkn1c	0.313187	0.0298901	4.19064	2.51574	4.21475	4.16612	2.98473	1.81641	17.5927	17.0861	6.88742	2.49299
Entpd2	0.362384	0.046588	4.51303	3.04862	4.56862	4.45521	3.51166	2.36257	22.7622	21.1051	10.3652	4.10155
C1ra	0.407642	0.0227007	5.83497	4.54035	5.805	5.86434	4.82363	4.1875	54.9915	57.7352	27.2159	17.089
Atp1a2	0.442315	0.0016193	6.75122	5.57437	6.78179	6.72	5.55198	5.59641	109.2	105.312	45.7453	47.0518
Apoe	0.448469	0.0455819	12.5399	11.383	12.3531	12.7053	11.419	11.3461	5239.18	6735.49	2727.4	2584.88
Fth1	0.449616	0.0304433	12.1822	11.0289	12.3081	12.0442	10.9066	11.1417	5078.24	4259.1	1911.78	2243.31
Tgm2	0.450429	0.0147854	4.99866	3.84803	4.90828	5.08371	3.74978	3.94002	29.0726	33.1808	12.4022	14.2429
Phyhd1	0.469278	0.0391488	5.08434	3.99286	5.04146	5.12598	4.28209	3.63072	31.9808	34.2002	18.3864	11.297
Pla2g7	0.472893	0.0080607	7.25361	6.1732	7.24437	7.26279	6.02155	6.31041	150.859	153.885	63.7289	77.828
Ndrg1	0.482977	0.00793421	6.51495	5.46498	6.49244	6.53712	5.58985	5.32827	89.1735	92.6517	46.9905	38.8999
Ndrg2	0.483005	0.0196284	6.33462	5.28473	6.22459	6.43685	5.2954	5.27397	73.894	86.3577	38.1294	37.4277
C330013J21Rik	0.490299	0.0232836	4.03656	3.00829	4.07624	3.99576	3.21133	2.77193	15.8912	15.0751	8.22985	5.78211
Bdh2	0.496948	0.00233202	4.29581	3.28698	4.27376	4.31754	3.23066	3.34119	18.3703	19.0934	8.35284	9.06582
Macrod1	0.516704	0.00919983	5.48934	4.53675	5.55514	5.4204	4.53362	4.53987	46.0873	42.1796	22.0772	22.1025
S100a1	0.522624	0.00958354	6.73883	5.80268	6.67581	6.79922	5.74721	5.85609	101.396	111.314	52.5205	56.5325
Pink1	0.530372	0.0272568	6.61951	5.70459	6.51211	6.71947	5.61059	5.79284	90.4122	105.271	47.6841	54.0653
Gpam	0.530918	0.0261673	5.16306	4.24962	5.12809	5.1972	4.03429	4.43694	34.0224	35.9848	15.3243	20.5148
Tmem176a	0.531717	0.0208008	6.54997	5.6387	6.44887	6.64444	5.60768	5.66907	86.4921	99.8844	47.5868	49.5369
Tcea3	0.540442	0.0410256	4.67415	3.78637	4.54914	4.7892	3.65115	3.90999	22.4454	26.8677	11.5174	13.9318
Oplah	0.540994	0.0439862	4.31104	3.42472	4.1605	4.44734	3.45097	3.39798	16.9084	20.9842	9.89684	9.46987
Mid1ip1	0.547714	0.0418801	7.0955	6.22699	7.17749	7.00856	6.41355	6.01266	143.979	128.865	83.9436	63.1245
Rnf130	0.548016	0.0212754	6.2375	5.36979	6.32641	6.14276	5.42451	5.31292	79.3701	70.2546	41.7942	38.4805
Tmem176b	0.550072	0.0325358	8.76873	7.90642	8.64685	8.88111	7.85581	7.95531	400.456	474.579	229.829	245.528
Rassf4	0.552805	0.0406925	4.86576	4.0106	4.97716	4.74503	3.88212	4.12858	30.5426	26.035	13.6909	16.3744
Cadm3	0.56299	0.00235397	4.08003	3.25121	4.10693	4.05261	3.27621	3.22577	16.2549	15.7231	8.65402	8.29257
Kcnk1	0.571426	0.0419899	4.83689	4.02953	4.96174	4.7002	4.01058	4.04824	30.2073	25.2084	15.06	15.4324
Ypel3	0.599014	0.0248138	6.45939	5.72006	6.36403	6.54884	5.70257	5.73733	81.4954	93.4178	50.8912	51.9875
Cebpd	0.60144	0.018011	8.20712	7.47361	8.15365	8.25867	7.56697	7.37379	284.213	307.918	187.949	163.741
Mgst1	0.601776	0.0242927	7.22655	6.49385	7.13493	7.31269	6.52833	6.45852	139.767	159.339	90.9768	86.3523
Naga	0.607449	0.0272929	4.26728	3.54812	4.17614	4.353	3.4869	3.60684	17.1037	19.5949	10.1717	11.103
Tmem132b	0.616784	0.037612	4.60265	3.90548	4.50984	4.68984	4.00574	3.79774	21.8156	25.0151	15.0077	12.8127
Nudt6	0.617467	0.0344707	4.52842	3.83285	4.54084	4.51589	3.65291	3.99283	22.3106	22.0615	11.5332	14.8165
Peli2	0.619324	0.0167575	4.54321	3.85197	4.59412	4.49043	3.93051	3.76892	23.1875	21.659	14.1943	12.5399
Pcdhgb6	0.631376	0.0158289	4.10317	3.43974	4.16712	4.03625	3.4116	3.46735	16.9902	15.5369	9.60406	9.98796
Pdlim4	0.631422	0.0456997	5.75431	5.09099	5.82672	5.67807	5.2289	4.93848	55.842	50.631	36.3702	29.4554
H1f0	0.638053	0.0417662	5.89985	5.2516	5.96297	5.83385	5.38524	5.10431	61.4722	56.5195	40.6472	33.1657
Cyp4v3	0.642258	0.00326514	4.84234	4.20356	4.87047	4.81365	4.21626	4.19076	28.2949	27.3521	17.5219	17.1396
Rgma	0.649968	0.00168267	5.81591	5.19435	5.8348	5.79676	5.20701	5.18157	56.1618	55.0577	35.8065	35.0478
Phpt1	0.656284	0.0174256	6.58707	5.97947	6.5262	6.64548	6.02314	5.93443	91.3103	99.9643	63.8044	59.7451
Sft2d2	0.661042	0.00987722	4.64962	4.05243	4.66118	4.63797	3.97862	4.12265	24.3388	24.1	14.7087	16.305
Colec12	0.661232	0.0245498	4.74819	4.15142	4.78395	4.71152	4.25232	4.04292	26.5896	25.4143	17.9917	15.372
Pcsk1n	0.663756	0.0255461	4.82968	4.23841	4.75007	4.90513	4.21435	4.26208	25.9499	29.2062	17.4973	18.0598
Aldh6a1	0.666836	0.0353807	4.67409	4.08949	4.75441	4.58903	4.15186	4.02431	26.0302	23.2648	16.7141	15.1629
Anxa4	0.668108	0.0103162	4.93859	4.35674	4.98678	4.88872	4.35638	4.3571	30.7548	28.8686	19.4111	19.357
Dtd1	0.670274	0.0256151	4.67997	4.1028	4.63112	4.72723	4.00881	4.19103	23.8166	25.7013	15.0409	17.1452
Stard5	0.678903	0.0363458	4.86012	4.3014	4.78385	4.93257	4.37633	4.22236	26.5883	29.787	19.6962	17.541
Fstl1	0.681698	0.0493508	8.52393	7.97114	8.46179	8.58351	7.83786	8.09314	352.127	385.936	226.975	270.248
Nxn	0.690615	0.043758	5.32701	4.79297	5.32842	5.3256	4.92641	4.64591	39.2406	39.4358	29.3027	23.8662
Mapk3	0.696331	0.0177094	6.01546	5.4933	6.06933	5.9595	5.46153	5.52439	66.2526	61.7565	42.908	44.7191
Fam213a	0.696814	0.0054157	6.29068	5.76953	6.29943	6.28189	5.8135	5.72418	77.8824	77.4722	55.0404	51.5081
Bphl	0.697977	0.0443957	4.49745	3.9787	4.39927	4.58937	3.98466	3.97271	20.1325	23.266	14.7757	14.5966
1700018L02Rik	0.707172	0.0431052	4.183	3.68313	4.18516	4.18083	3.80593	3.5489	17.2172	17.2811	12.9387	10.6259
Slc22a23	0.709074	0.0375466	6.24982	5.75383	6.20456	6.29369	5.85045	5.65026	72.8626	78.1154	56.4952	48.8846
Plekhb2	0.713166	0.00164232	4.94756	4.45987	4.94149	4.95361	4.43774	4.48166	29.7737	30.2426	20.5956	21.1938
Abca2	0.713675	0.00209998	4.25764	3.77098	4.27477	4.2403	3.75987	3.78201	18.3847	18.0515	12.4998	12.6664
Tmem106c	0.715823	0.0245294	5.03256	4.55024	5.03884	5.02626	4.63845	4.45627	31.922	31.8573	23.8199	20.8048
Birc2	0.716061	0.0374809	4.54696	4.06511	4.62445	4.46506	4.09001	4.03977	23.7017	21.267	15.971	15.3386
Prdx5	0.719312	0.0212641	8.93149	8.45618	8.88559	8.97598	8.4002	8.51007	472.704	506.917	335.645	361.138
Hfe	0.72136	0.0379196	4.37501	3.9038	4.33429	4.41461	3.80353	3.99755	19.2015	20.4982	12.9139	14.8695
Jtb	0.729007	0.0075656	4.72775	4.27175	4.71871	4.73673	4.31631	4.22577	25.3702	25.8806	18.8532	17.5864
Wasf3	0.729828	0.0219924	4.33082	3.87645	4.27205	4.38729	3.89248	3.86024	18.3486	20.0944	13.7997	13.4276
Tmem189	0.731057	0.020924	4.42044	3.9685	4.43646	4.40423	3.89166	4.04144	20.684	20.3458	13.7906	15.3594
Dos	0.73133	0.0404623	4.26941	3.81801	4.34234	4.1926	3.77702	3.85786	19.3141	17.4334	12.6612	13.4047
Bnip3l	0.735885	0.0324345	5.85357	5.41112	5.92143	5.78236	5.426	5.39609	59.6995	54.5055	41.8406	40.829
Cdc42ep1	0.738148	0.0336968	6.08954	5.65152	6.15237	6.02385	5.60938	5.69246	70.2375	64.6214	47.6468	50.3691
Fam102a	0.740187	0.0155393	4.00498	3.57094	4.02047	3.98932	3.63002	3.50934	15.2518	15.0082	11.3388	10.313
Btbd1	0.742778	0.0413725	6.35375	5.92475	6.2974	6.40798	5.84883	5.99687	77.7723	84.6396	56.4292	62.4366
Wnt5a	0.745184	0.022129	4.03145	3.60712	4.03731	4.02558	3.67949	3.53093	15.4426	15.4158	11.7693	10.4834
Slc7a2	0.746543	0.0351551	5.0934	4.6717	5.14905	5.03553	4.72656	4.61468	34.5356	32.0717	25.3828	23.3364
Dnajb2	0.746676	0.0304898	4.75963	4.33818	4.82324	4.69309	4.32998	4.34634	27.3516	25.0818	19.0418	19.2075
Ccdc122	0.751791	0.0279001	4.6125	4.2009	4.66738	4.55545	4.23322	4.16784	24.4482	22.7074	17.7423	16.8556
Fam63a	0.752052	0.00117479	4.10475	3.69366	4.1034	4.1061	3.67735	3.70979	16.2136	16.3586	11.7497	12
Mapk8ip3	0.753794	0.0232664	4.71323	4.30547	4.75236	4.673	4.35542	4.25373	25.9924	24.7205	19.3989	17.9504
Stard7	0.755082	0.0057433	4.62028	4.21498	4.64647	4.5936	4.20842	4.22152	24.0822	23.3422	17.4226	17.533
Irs2	0.755131	0.0181313	6.02235	5.61715	6.06651	5.9768	5.59344	5.64048	66.1218	62.5154	47.1127	48.5512
Repin1	0.761942	0.00827103	4.72338	4.33113	4.69472	4.75148	4.3133	4.34875	24.9355	26.1572	18.8115	19.2417
Pdcd6	0.762829	0.00837324	4.63578	4.24521	4.62344	4.64802	4.20667	4.28275	23.6851	24.2774	17.4	18.3371
Gab1	0.763298	0.0198684	5.25919	4.86951	5.27848	5.23964	4.92709	4.80953	37.8717	37.0986	29.317	26.8556
Pfkfb3	0.763474	0.0114619	5.58963	5.20028	5.62243	5.55608	5.1791	5.22116	48.3374	46.4459	35.1023	36.0541
Bcr	0.764337	0.00980818	5.17139	4.78367	5.13827	5.20376	4.772	4.79524	34.2718	36.1609	26.2266	26.5824
Dcaf8	0.767075	0.0467894	6.36447	5.98191	6.29364	6.43199	6.02053	5.94223	77.5679	86.0774	63.6891	60.0772
Prr13	0.768628	0.00957118	6.39788	6.01824	6.40404	6.39169	5.97558	6.05967	83.8156	83.6814	61.7035	65.2587
Cpsf3	0.770917	0.0357963	5.64423	5.26888	5.67129	5.61666	5.34243	5.19137	50.037	48.4811	39.4309	35.295
Lrp1	0.773363	0.0429602	6.86363	6.49285	6.86849	6.85874	6.39954	6.58048	116.029	116.059	83.1225	94.0658
Mettl3	0.779118	0.00883233	4.24704	3.88695	4.25854	4.23544	3.85076	3.92226	18.1681	17.9886	13.3779	14.0628
Uchl1	0.779618	0.0138391	7.59515	7.23599	7.56424	7.6254	7.2072	7.26421	188.557	198.164	146.247	151.699
Ahnak	0.782108	0.0482769	7.51315	7.15859	7.46875	7.55623	7.22946	7.08406	176.416	188.839	148.538	133.772
Mvb12b	0.793651	0.0438091	4.90894	4.57551	4.96626	4.84924	4.54096	4.60926	30.3067	28.0655	22.1979	23.2477
Meis3	0.796996	0.023804	4.53822	4.21087	4.5822	4.49287	4.22474	4.19686	22.9892	21.7013	17.6327	17.2194
Rp2h	0.79744	0.0284042	4.44085	4.11429	4.48444	4.39589	4.14402	4.08394	21.4175	20.2248	16.6191	15.8478
Rab11b	0.81129	0.0058234	5.23981	4.9381	5.24783	5.23174	4.96163	4.91417	37.0548	36.8914	30.0518	28.9524
Cnot8	0.813272	0.0213907	5.67687	5.37868	5.64638	5.70674	5.34594	5.41069	49.1639	51.6691	39.5287	41.2572
Ppp2cb	0.813804	0.0153038	6.34029	6.04304	6.36547	6.31466	6.01573	6.06985	81.5781	79.28	63.4736	65.7287
Sccpdh	0.81398	0.031333	4.62832	4.33138	4.64877	4.60758	4.38455	4.27619	24.1224	23.5805	19.8156	18.2486
Arl2	0.814514	0.00381964	5.5602	5.26421	5.54781	5.57248	5.25053	5.27776	45.8508	46.9883	36.9353	37.5374
Ddrgk1	0.817997	0.0358731	6.84483	6.555	6.88123	6.80748	6.51104	6.59765	117.067	111.975	89.8834	95.2036
Adh5	0.819835	0.0381096	6.2042	5.9176	6.23349	6.1743	5.8641	5.96919	74.3587	71.8366	57.0413	61.2325
Kctd1	0.81994	0.00242922	4.49152	4.20511	4.47867	4.50425	4.20392	4.2063	21.3283	21.8801	17.3658	17.3396
Stx6	0.820721	0.0332334	5.31677	5.03173	5.28222	5.35051	4.98937	5.07289	37.9732	40.1427	30.654	32.4369
Pcdhgc3	0.821709	0.0490759	7.55377	7.27047	7.49358	7.61156	7.26419	7.27673	179.496	196.262	152.181	153.03
Myd88	0.826248	0.0159846	4.26552	3.99017	4.23904	4.29152	4.01234	3.96765	17.9111	18.7417	15.0825	14.544
Anapc4	1.20034	0.049317	4.64923	4.91267	4.58237	4.71312	4.90152	4.92374	22.994	25.4523	28.7875	29.1586
Dpysl3	1.2018	0.0150258	5.52265	5.78784	5.55815	5.48625	5.79058	5.7851	46.1894	44.2137	54.162	53.7835
Notch1	1.20227	0.0477602	4.74875	5.01451	4.7159	4.78087	5.06168	4.96575	25.3207	26.7253	32.2852	30.0482
Txnl1	1.20866	0.0438487	5.55965	5.83306	5.49563	5.62094	5.81795	5.84801	44.1884	48.6359	55.218	56.2255
Paqr8	1.21063	0.0264603	4.11839	4.39414	4.1343	4.1023	4.43312	4.35408	16.5876	16.3211	20.5311	19.3219
Impa1	1.21957	0.00902586	3.75944	4.04581	3.78175	3.73678	4.06238	4.02906	12.7743	12.4434	15.6526	15.2246
Rap2a	1.22034	0.031785	3.73841	4.0257	3.76197	3.71446	3.98161	4.06847	12.5868	12.2369	14.7456	15.6749
Rasa3	1.2226	0.0336906	5.46832	5.75828	5.4158	5.519	5.78389	5.7322	41.7558	45.2498	53.9072	51.8111
Ranbp9	1.22476	0.0369469	4.80143	5.09392	4.85477	4.74605	5.06586	5.12145	27.9799	26.0665	32.3808	33.5879
Tmem30a	1.2318	0.0353294	5.60393	5.9047	5.56892	5.63811	5.85973	5.94831	46.5434	49.2312	56.8696	60.3459
Ssfa2	1.23396	0.0175866	5.08531	5.38861	5.04519	5.12434	5.40648	5.37052	32.0696	34.18	41.2698	40.1027
Rps4l	1.23424	0.0349056	3.85707	4.16069	3.83157	3.88213	4.20828	4.11148	13.2586	13.8682	17.4248	16.1776
Ppia	1.23537	0.00903105	9.78131	10.0863	9.77818	9.78444	10.0598	10.1122	878.442	888.566	1062.6	1098.43
Pten	1.239	0.0164148	3.92139	4.23056	3.87787	3.96363	4.22022	4.24083	13.7237	14.7324	17.5773	17.7894
Ybx1	1.24064	0.00688601	8.62215	8.93323	8.59804	8.64585	8.91999	8.94635	387.105	403.044	481.673	489.022
Adgrl2	1.24068	0.0211832	3.99527	4.3064	4.03954	3.94961	4.28624	4.32628	15.4694	14.582	18.4469	18.9357
Ssr1	1.24117	0.0123375	4.11999	4.43169	4.1209	4.11908	4.46278	4.39993	16.4251	16.524	20.9783	19.9783
Las1l	1.2448	0.00796279	4.47996	4.79588	4.44804	4.51119	4.79823	4.79353	20.8607	21.9979	26.7301	26.5568
Eif2s1	1.24765	0.0479197	4.71838	5.0376	4.75769	4.67796	4.97979	5.09318	26.0942	24.8186	30.4476	32.9177
Man1a2	1.24936	0.0156391	4.07522	4.39641	4.12001	4.029	4.39775	4.39508	16.4143	15.4639	20.0095	19.9087
Sept7	1.25112	0.0368061	7.40893	7.73214	7.35481	7.46109	7.76989	7.69338	162.945	176.735	216.493	204.61
Pa2g4	1.253	0.042047	6.15284	6.47824	6.22222	6.07996	6.45376	6.5023	73.7742	67.2368	86.35	89.0594
Usp25	1.25748	0.0232233	4.88014	5.21068	4.91369	4.84579	5.24724	5.17317	29.1882	28.0043	36.8533	34.8487
Smg7	1.25765	0.0208072	3.902	4.23273	3.94737	3.85516	4.20946	4.25563	14.4501	13.5945	17.4392	17.9836
Mrpl46	1.25864	0.0198021	3.82435	4.15622	3.84342	3.80502	4.11616	4.1952	13.3761	13.0953	16.2846	17.2054
Gtf2e2	1.25955	0.042852	3.74508	4.07799	3.70134	3.78754	4.13064	4.02334	12.0279	12.9242	16.4598	15.1602
G3bp2	1.26226	0.00990956	5.69013	6.02614	5.70803	5.67201	5.99943	6.05236	51.3557	50.4279	62.7536	64.9328
Cfl1	1.26686	0.0257397	9.59998	9.94123	9.61454	9.58527	9.89204	9.9888	784.135	773.864	945.816	1008.3
Copg2	1.26693	0.018095	4.35133	4.69267	4.37785	4.32431	4.7279	4.65655	19.8223	19.2046	25.4114	24.0611
Rrn3	1.26704	0.000369506	3.95612	4.29758	3.94995	3.96226	4.29432	4.30083	14.478	14.7186	18.5564	18.5871
Golim4	1.28872	0.0223862	5.69558	6.06153	5.64486	5.74458	6.09161	6.03081	49.1132	53.0797	66.9607	63.954
Zcrb1	1.29086	0.0368764	6.38456	6.75289	6.36165	6.40711	6.68977	6.81336	81.3623	84.6034	101.874	110.728
Pak1	1.29408	0.044931	4.03584	4.40777	3.94107	4.12477	4.39541	4.42004	14.3834	16.592	19.9756	20.2741
Rnps1	1.29607	0.0073107	5.85574	6.22988	5.85001	5.86144	6.20162	6.2576	56.7707	57.6442	72.3444	75.0117
Kirrel	1.29714	0.0234546	4.48332	4.85865	4.45064	4.51526	4.90307	4.81283	20.9003	22.0637	28.8207	26.9274
Dcbld2	1.29735	0.00129288	3.66262	4.03818	3.67122	3.65396	4.04802	4.02828	11.7586	11.6937	15.488	15.2167
Uggt1	1.30129	0.0261496	4.25433	4.63427	4.22808	4.2801	4.58198	4.68472	17.7693	18.5941	22.8704	24.5574
Pno1	1.302	0.0238852	4.25678	4.63751	4.30038	4.21183	4.59671	4.67719	18.7336	17.6898	23.1155	24.4241
Slc35f1	1.31305	0.0489848	4.69538	5.08829	4.76464	4.62262	5.0294	5.14488	26.225	23.8486	31.548	34.1559
Slmap	1.31311	0.0178636	4.8438	5.23679	4.87297	4.81403	5.19536	5.27707	28.3483	27.3735	35.5157	37.5279
Cmtr1	1.31378	0.00859641	4.06335	4.45707	4.02303	4.10257	4.4679	4.44617	15.2825	16.3246	21.0566	20.6625
Ncstn	1.31543	7.01309e-05	5.4258	5.82133	5.42745	5.42416	5.82394	5.81872	42.1025	42.3098	55.4533	55.0764
Setd8	1.31625	0.0254766	5.60359	6.00002	5.67573	5.52765	5.99517	6.00485	50.1965	45.533	62.5664	62.7976
Sh3pxd2b	1.3167	0.033469	4.70495	5.10187	4.78197	4.62358	5.07652	5.12679	26.554	23.8654	32.629	33.7171
Top2b	1.3179	0.0138766	5.27432	5.67256	5.29276	5.25564	5.711	5.63306	38.2604	37.5355	51.2033	48.3053
Tmem63b	1.32231	0.00997152	4.78337	5.18643	4.77826	4.78845	5.22117	5.15082	26.4837	26.874	36.1761	34.2986
Flnb	1.32378	0.00314782	6.77846	7.18312	6.75212	6.80434	7.18532	7.18092	106.962	111.739	144.037	143.143
Nme1	1.3332	0.0303552	4.93282	5.34772	5.00969	4.85163	5.37253	5.32246	31.2655	28.1242	40.2877	38.7575
Tpp2	1.33533	0.00959506	4.12023	4.53743	4.15477	4.08484	4.56156	4.51288	16.8392	16.1148	22.5361	21.6873
Zrsr2	1.34231	0.0407063	4.37112	4.79584	4.27008	4.46555	4.77155	4.81973	18.3242	21.2815	26.2223	27.0635
Fam171a1	1.34421	0.0469477	4.17745	4.60421	4.13141	4.22206	4.67812	4.5263	16.553	17.8214	24.5168	21.8981
Nhsl1	1.35286	0.0344482	3.62688	4.0629	3.53101	3.71679	4.08374	4.04176	10.5773	12.2577	15.9016	15.3691
Tubb5	1.3575	0.0408125	7.43927	7.88022	7.45506	7.4233	7.79968	7.9565	174.743	172.144	221.029	245.75
Rangap1	1.35842	0.0200114	5.30667	5.7486	5.25214	5.35921	5.71018	5.78603	37.171	40.4026	51.1729	53.8219
Fryl	1.36995	0.0184286	3.60376	4.05789	3.67505	3.52878	4.05227	4.06348	11.7924	10.6402	15.5369	15.618
Galnt1	1.37123	0.0156291	4.72417	5.17963	4.71864	4.72967	5.12953	5.22806	25.3712	25.7616	33.8874	36.2421
Mia3	1.39356	0.0252801	4.39706	4.87583	4.48272	4.30599	4.89443	4.85699	21.3924	18.9527	28.643	27.7969
Uxs1	1.3969	0.00680073	4.6676	5.14983	4.6226	4.71124	5.16197	5.13759	23.673	25.4214	34.6817	33.9779
Pdlim5	1.39917	0.0495093	5.71669	6.20127	5.6936	5.73942	6.29208	6.10435	50.8353	52.8892	77.093	67.3501
Slc20a1	1.40826	0.00979922	4.21417	4.70809	4.22541	4.20285	4.66656	4.74845	17.7347	17.5744	24.3121	25.7121
Iqgap2	1.41925	0.0459295	3.93069	4.43582	3.94184	3.91946	4.52716	4.3383	14.3915	14.2612	21.9828	19.1017
Rfc3	1.41963	0.00180078	3.70018	4.20569	3.7168	3.68336	4.19185	4.2194	12.1684	11.9567	17.2165	17.5142
Psme4	1.43725	0.0339831	3.8243	4.34761	3.87556	3.77115	4.42043	4.27092	13.7002	12.7708	20.3441	18.1854
Cenpt	1.44399	0.0233978	3.55322	4.08328	3.54824	3.55819	4.15067	4.01259	10.7163	10.8794	16.7049	15.0415
Pdcl3	1.44989	0.00346956	4.59696	5.13291	4.56215	4.63096	5.1212	5.14454	22.6606	23.992	33.6875	34.1478
Rtn4	1.46194	0.00547956	6.54843	7.09632	6.59129	6.50426	7.11243	7.08002	95.5736	90.5715	136.893	133.409
Znfx1	1.47997	0.0414008	5.11916	5.68473	4.96718	5.25664	5.67206	5.69729	30.33	37.5606	49.8135	50.553
2700029M09Rik	1.48529	0.0162395	4.12769	4.69843	4.04395	4.20683	4.72462	4.67177	15.5209	17.6248	25.3525	24.3291
Pcgf5	1.48777	0.00868658	4.22897	4.80213	4.1836	4.27296	4.83444	4.76908	17.2	18.4994	27.4366	26.0957
Spcs3	1.48778	0.00914602	3.92983	4.50299	3.9625	3.8964	4.54221	4.46266	14.6136	14.0203	22.2235	20.9125
Vcl	1.49337	0.044139	5.97231	6.55088	5.83187	6.10028	6.60195	6.49794	56.05	68.2033	95.8021	88.7881
Ssx2ip	1.51446	0.00698306	4.24468	4.84348	4.27513	4.21356	4.87885	4.80723	18.3919	17.7146	28.3255	26.8217
Anapc15	1.51592	0.0158502	4.60941	5.20961	4.51132	4.70126	5.20903	5.21019	21.8418	25.2398	35.8651	35.7842
Ccng1	1.52406	0.00784983	6.97762	7.58553	6.90889	7.04321	7.58156	7.58949	119.356	132.043	189.879	190.331
Lsm2	1.5256	0.0227129	3.59081	4.20019	3.6276	3.55306	4.27063	4.12613	11.3789	10.8388	18.24	16.3548
Rai14	1.52574	0.00268998	4.14194	4.75145	4.10292	4.17993	4.757	4.74588	16.2101	17.282	25.9505	25.6647
Myh9	1.54152	0.0479317	6.77116	7.39551	6.59414	6.92881	7.35523	7.4347	95.7655	121.898	162.165	170.868
Pls3	1.54384	0.0333704	6.27185	6.89837	6.11859	6.41038	6.91247	6.88414	68.5933	84.7986	119.047	116.347
Cask	1.56307	0.021071	3.66461	4.30899	3.70023	3.62809	4.38031	4.23398	12.0182	11.4714	19.7594	17.7015
Gbp6	1.56794	0.0125622	5.15815	5.80703	5.06643	5.24439	5.82377	5.79008	32.5611	37.2372	55.4485	53.9771
Cbfb	1.57352	0.0435064	4.41447	5.06847	4.2515	4.56088	5.0101	5.12456	18.0776	22.806	31.1171	33.6672
Tnc	1.62953	0.00780853	6.63351	7.33796	6.64734	6.61954	7.28831	7.38595	99.3996	98.1906	154.77	165.16
Calu	1.63547	0.0142709	7.30594	8.01565	7.31996	7.29179	8.08128	7.94689	159.033	157.064	268.889	244.112
Ncam1	1.63598	0.027615	5.0236	5.73376	4.86202	5.16889	5.75179	5.7155	28.1279	35.287	52.7017	51.2085
Rrm1	1.68679	0.00239677	4.41969	5.17397	4.4295	4.4098	5.14548	5.20191	20.5824	20.4434	34.2771	35.576
2700094K13Rik	1.68793	0.00139974	3.87732	4.63258	3.87664	3.87801	4.65443	4.61039	13.7119	13.8315	24.1022	23.2762
Nucb2	1.68799	0.0155487	4.33132	5.08662	4.42274	4.23371	5.03702	5.13458	20.4812	17.981	31.7224	33.9094
Lamc1	1.71094	0.0454682	6.03067	6.80545	5.88231	6.16518	6.90552	6.69793	58.0803	71.3906	118.473	102.138
Snhg6	1.73133	0.0136748	4.67321	5.46509	4.78208	4.55545	5.43447	5.49508	26.5571	22.724	42.0998	43.8155
Parp14	1.78439	0.036697	4.47379	5.30922	4.27771	4.64638	5.37864	5.2363	18.4279	24.2618	40.4658	36.4562
H2afx	1.80548	0.00361609	4.65569	5.50807	4.64015	4.67107	5.46971	5.54544	23.9757	24.7015	43.1659	45.4077
Tlr3	1.81977	0.044838	3.62276	4.48652	3.34146	3.85807	4.46249	4.51015	9.15301	13.6247	20.9759	21.6494
Smtn	1.82888	0.00517181	3.5477	4.41866	3.54483	3.55057	4.46509	4.3707	10.6893	10.8205	21.0163	19.562
Ccnyl1	1.83517	0.0127147	3.18048	4.05639	3.25109	3.10623	4.11853	3.99145	8.53566	7.68731	16.3163	14.8108
Tbc1d1	1.85124	0.0261729	3.91216	4.80065	3.96801	3.85406	4.90207	4.69155	14.6739	13.5898	28.8037	24.6796
Tnfrsf12a	1.85656	0.0117697	4.83305	5.72568	4.93467	4.72374	5.6792	5.77072	29.6316	25.6601	50.0669	53.249
Ncapd2	1.8584	0.0357136	3.39873	4.2928	3.17244	3.5943	4.35507	4.22771	8.03045	11.1813	19.4005	17.6226
Zc3hav1	1.86178	0.0166547	3.15147	4.04816	3.05174	3.24475	3.97611	4.11677	7.30538	8.56075	14.6878	16.2476
Col12a1	1.87314	0.0318765	4.98991	5.89537	4.74043	5.20255	5.88203	5.90859	25.7744	36.1449	57.7755	58.6865
Nav2	1.91013	0.0177674	4.19446	5.12813	4.00575	4.36131	5.1211	5.13512	15.0902	19.7333	33.6873	33.9232
Tagln	1.92613	0.0437246	9.0488	9.99451	8.96072	9.1318	10.1311	9.84357	498.033	564.878	1116.49	911.647
Chaf1a	1.96842	0.0373601	3.02428	4.00132	3.11317	2.92956	4.1288	3.86149	7.66633	6.68677	16.441	13.4488
Ckap2	2.00927	0.0416376	4.12454	5.13121	4.01172	4.22917	5.26739	4.98083	15.1569	17.9207	37.3911	30.3789
Cdk1	2.03025	0.0345586	3.27658	4.29824	3.20191	3.34758	4.42735	4.15642	8.21665	9.26907	20.4497	16.7245
Incenp	2.04051	0.0208473	3.85358	4.88252	3.76587	3.93626	4.97876	4.77938	12.6254	14.4445	30.4311	26.2922
Snord22	2.04689	0.00766453	3.51685	4.55029	3.40951	3.61675	4.50886	4.59056	9.64329	11.3757	21.694	22.9487
Acta2	2.04693	0.0444581	9.636	10.6695	9.45256	9.79872	10.8006	10.5252	700.755	897.428	1776.31	1462.86
Mest	2.13327	0.0320403	4.97762	6.07069	4.76142	5.16561	6.17152	5.96229	26.167	35.2094	70.8371	60.9475
Racgap1	2.22848	0.0145729	3.434	4.59006	3.42976	3.43824	4.68399	4.48959	9.79364	9.93776	24.6245	21.3284
2810417H13Rik	2.26095	0.0248403	2.9641	4.14103	3.22813	2.64069	4.15766	4.1242	8.38508	5.2955	16.7928	16.3368
Ltbp1	2.26186	0.0272711	2.86286	4.04037	2.97625	2.73978	4.1605	3.90931	6.88187	5.74087	16.8291	13.9368
Tpx2	2.28092	0.0480376	3.91578	5.10539	4.08384	3.72552	5.26331	4.92803	15.9846	12.3512	37.2842	29.2525
Lmnb1	2.29859	0.0129288	4.41586	5.61661	4.20728	4.59806	5.6563	5.57579	17.5029	23.4345	49.2661	46.3951
Pbk	2.37564	0.00737631	3.16809	4.4164	3.2942	3.02989	4.46181	4.36952	8.82547	7.24364	20.9679	19.548
Ccnb2	2.48668	0.011903	2.94653	4.26076	2.71224	3.14804	4.29837	4.22213	5.56459	7.94323	18.6158	17.5541
Mlkl	2.50623	0.0230193	2.9654	4.29092	2.59328	3.26095	4.26247	4.31881	5.04527	8.67019	18.1331	18.8409
Ccna2	2.55035	0.0325017	3.12964	4.48034	3.07289	3.18425	4.63263	4.31006	7.42869	8.17304	23.7301	18.7168
Ube2c	2.55908	0.0144782	3.78695	5.14257	3.52948	4.00535	5.08729	5.19582	10.5671	15.2038	32.8852	35.4285
Cdc20	2.58533	0.0452814	2.82798	4.19833	2.5159	3.08442	4.35179	4.02659	4.72954	7.55702	19.3571	15.2013
Samd9l	2.6006	0.0216776	3.66075	5.0396	3.34022	3.92286	5.11159	4.96383	9.14522	14.3028	33.4628	30.0164
D17H6S56E-5	2.61005	0.0447703	3.67202	5.0561	3.66918	3.67486	4.8467	5.23892	11.7426	11.8898	27.6797	36.5371
H2-Q5	2.6148	0.0433006	2.6738	4.0605	2.1531	3.05559	3.9635	4.15138	3.45587	7.38603	14.5526	16.6698
Cdca8	2.64501	0.00329194	3.20178	4.60505	3.19584	3.2077	4.65571	4.55255	8.17849	8.32455	24.1277	22.3268
Slfn9	2.66866	0.029936	2.93766	4.35377	2.90227	2.9722	4.50474	4.18514	6.48856	6.91981	21.6332	17.0826
Ckap2l	2.69477	0.0354394	3.13756	4.56772	3.22566	3.04373	4.73043	4.3843	8.36997	7.32418	25.4647	19.7576
Ccnb1	2.78488	0.0478467	2.69761	4.17523	2.56875	2.8159	4.36704	3.95395	4.94313	6.1059	19.5742	14.4059
Cdca3	2.85053	0.00556943	3.47332	4.98455	3.26441	3.65577	4.96798	5.00093	8.62589	11.7191	30.1975	30.8275
Birc5	2.96535	0.00411236	3.68927	5.25747	3.53658	3.82733	5.29436	5.21962	10.6243	13.3265	38.1164	36.0331
Phf11d	2.97337	0.0390651	2.67759	4.24969	2.21665	3.02638	4.38595	4.09922	3.65665	7.22026	19.8451	16.0388
Ly6e	2.97836	0.0458937	3.96455	5.53907	3.19665	4.46304	5.46461	5.60988	8.18535	21.2506	43.0128	47.5353
H2-T22	3.24972	0.0413572	3.49546	5.19578	2.58711	4.04853	5.16476	5.22615	5.02082	15.6947	34.756	36.2041
Plk1	3.36759	0.0199928	2.65938	4.4111	2.43128	2.8563	4.53689	4.27328	4.40348	6.30934	22.1439	18.2236
